# Supplementary material for: Hydrogen peroxide as a crystal growth modifier of CaCO3
Source: Royal Society of Chemistry journal article supplement (doi:10.1039/c2ce06164c), 2012-01-01
Supplement: c2ce06164c.pdf [file c2ce06164c.pdf]

## Hydrogen peroxide as a crystal growth modifier of CaCO<sub>3</sub>

Feng-Wen Yan, Cun-Yue Guo, Xiao-Hui Zhang, Guo-Qing Yuan

### Supporting information

Table S1. Intensities of Pure Calcite and Calcite Grown in the Presence of H<sub>2</sub>O<sub>2</sub>

| $2\theta$ | <i>hkl</i><br>assignment | H <sub>2</sub> O <sub>2</sub> calcite<br>intensity | Pure calcite<br>intensity |
|-----------|--------------------------|----------------------------------------------------|---------------------------|
| 23.04 □   | 012                      | 9.2                                                | 10 ± 1.1                  |
| 29.43     | 104                      | 100                                                | 100                       |
| 31.45     | 006                      | 2.2                                                | 3.9 ± 1.2                 |
| 36.00     | 110                      | 13.9                                               | 14 ± 1.6                  |
| 39.44     | 113                      | 21.4                                               | 21 ± 2.5                  |
| 43.18     | 202                      | 19.1                                               | 18 ± 1.3                  |
| 47.17     | 024                      | 9.6                                                | 8.0 ± 1.9                 |
| 47.53     | 018                      | 30.7                                               | 24 ± 4.5                  |
| 48.56     | 116                      | 25.4                                               | 24 ± 2.2                  |

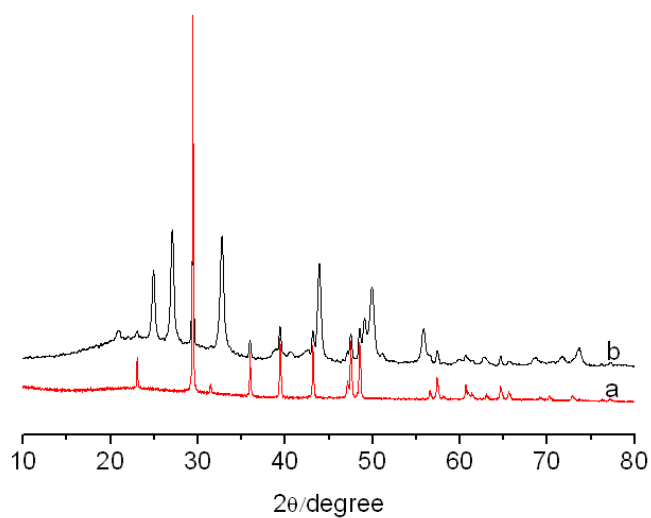

Fig.S1 XRD patterns of  $\text{CaCO}_3$  crystals precipitated at: a) pH= 11.4, b) PSS and  $\text{H}_2\text{O}_2$  mixture  
solution

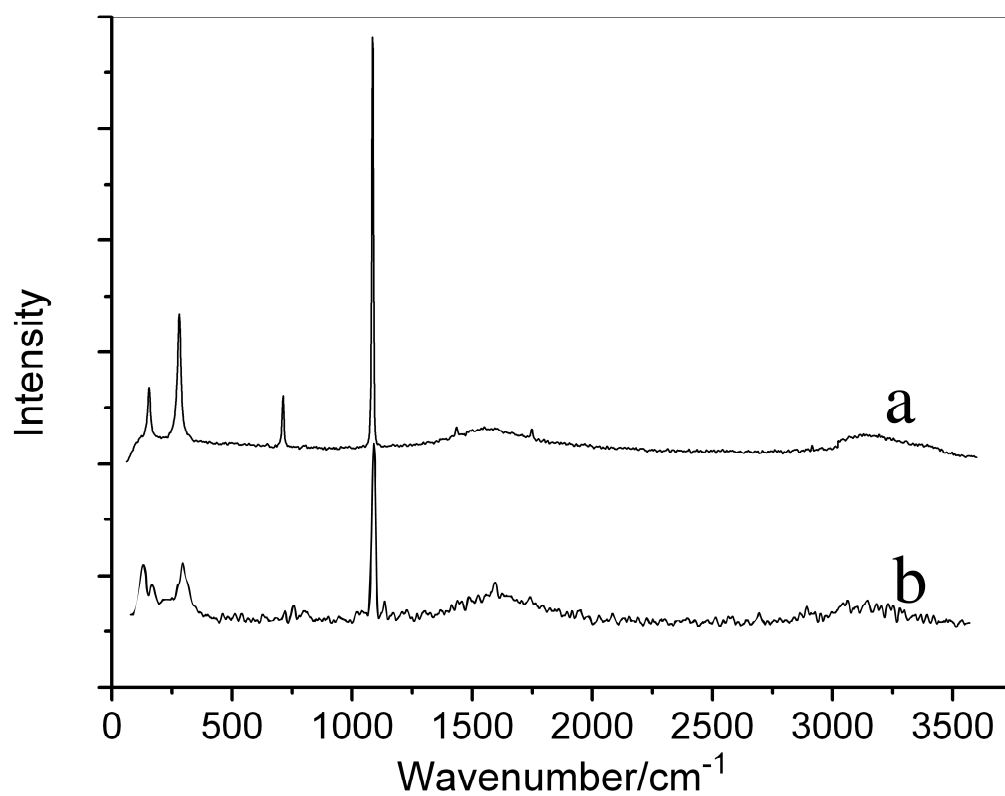

Fig.S2 Raman spectra of CaCO<sub>3</sub> crystals precipitated at: a) pH= 11.4, b) PSS and H<sub>2</sub>O<sub>2</sub> mixture  
solution
